# Supplementary material for: Regulatory Effect of Ficus carica Latex on Cell Cycle Progression in Human Papillomavirus-Positive Cervical Cancer Cell Lines: Insights from Gene Expression Analysis
Source: MDPI journal article supplement (doi:10.3390/ph16121723), 2023-12-12
Supplement: s1 [file s1]

| ENSEMBL ID      | Gene Name | Expression Status | Fold change (log <sub>2</sub> ratio) |
|-----------------|-----------|-------------------|--------------------------------------|
| ENSG00000006576 | TSHZ2     | Upregulated       | 4.605                                |
| ENSG00000010270 | GLT8D2    | Upregulated       | 5.841                                |
| ENSG00000020129 | RASIP1    | Upregulated       | 2.618                                |
| ENSG00000034510 | NDRG1     | Upregulated       | 4.255                                |
| ENSG00000040199 | STOM      | Upregulated       | 6.212                                |
| ENSG00000047634 | PLEKHG4   | Upregulated       | 5.362                                |
| ENSG00000048544 | KLF4      | Upregulated       | 5.33                                 |
| ENSG00000053770 | RMRP      | Upregulated       | 6.467                                |
| ENSG00000056586 | FBXO4     | Upregulated       | 5.549                                |
| ENSG00000060642 | GPCPD1    | Upregulated       | 7.987                                |
| ENSG00000066933 | HIST1H1E  | Upregulated       | 5.732                                |
| ENSG00000070366 | CTSF      | Upregulated       | 3.788                                |
| ENSG00000076685 | BET1      | Upregulated       | 7.918                                |
| ENSG00000077514 | TMEM14C   | Upregulated       | 4.12                                 |
| ENSG00000079335 | BRIX1     | Upregulated       | 7.706                                |
| ENSG00000081913 | HIF1A     | Upregulated       | 6.226                                |
| ENSG00000083457 | TMEM126A  | Upregulated       | 5.406                                |
| ENSG00000085491 | CEP72     | Upregulated       | 6.997                                |
| ENSG00000091157 | CALR      | Upregulated       | 7.985                                |
| ENSG00000099910 | MZT1      | Upregulated       | 5.134                                |
| ENSG00000100243 | RAD1      | Upregulated       | 3.068                                |
| ENSG00000100304 | RPL27     | Upregulated       | 7.426                                |
| ENSG00000100410 | SUB1      | Upregulated       | 7.192                                |
| ENSG00000100644 | PRRT3.AS1 | Upregulated       | 3.534                                |

|                 |          |             |       |
|-----------------|----------|-------------|-------|
| ENSG00000100888 | PDCD6    | Upregulated | 7.213 |
| ENSG00000101191 | TMEM126B | Upregulated | 4.164 |
| ENSG00000104419 | NELFE    | Upregulated | 4.619 |
| ENSG00000105223 | RHEBL1   | Upregulated | 7.161 |
| ENSG00000105323 | PLD3     | Upregulated | 6.522 |
| ENSG00000105518 | MRPS30   | Upregulated | 4.743 |
| ENSG00000105538 | MRPS10   | Upregulated | 4.161 |
| ENSG00000105829 | NFIL3    | Upregulated | 4.839 |
| ENSG00000108100 | CENPK    | Upregulated | 4.628 |
| ENSG00000111696 | DDX59    | Upregulated | 6.883 |
| ENSG00000111843 | C6orf136 | Upregulated | 5.69  |
| ENSG00000112234 | KLF13    | Upregulated | 5.772 |
| ENSG00000112877 | TMEM256  | Upregulated | 2.66  |
| ENSG00000112996 | CUL5     | Upregulated | 4.449 |
| ENSG00000113387 | SNRPD2   | Upregulated | 5.395 |
| ENSG00000113456 | RPS27A   | Upregulated | 4.309 |
| ENSG00000113460 | TMSB10   | Upregulated | 5.669 |
| ENSG00000113761 | DNAJC21  | Upregulated | 7.386 |
| ENSG00000115942 | GAS5     | Upregulated | 5.269 |
| ENSG00000115944 | PAIP1    | Upregulated | 5.528 |
| ENSG00000118058 | RPL37    | Upregulated | 5.679 |
| ENSG00000118197 | CHMP1B   | Upregulated | 5.898 |
| ENSG00000119004 | MRPS23   | Upregulated | 4.903 |
| ENSG00000120820 | RNF111   | Upregulated | 4.983 |
| ENSG00000122786 | GPR108   | Upregulated | 5.103 |

|                 |          |             |       |
|-----------------|----------|-------------|-------|
| ENSG00000123219 | COA4     | Upregulated | 4.777 |
| ENSG00000123562 | CYB5R3   | Upregulated | 4.75  |
| ENSG00000123636 | MRPL14   | Upregulated | 3.646 |
| ENSG00000125734 | SLC6A9   | Upregulated | 6.396 |
| ENSG00000125743 | MORF4L2  | Upregulated | 4.573 |
| ENSG00000125772 | TBC1D7   | Upregulated | 4.731 |
| ENSG00000127337 | ATP6AP2  | Upregulated | 6.933 |
| ENSG00000127870 | TTLL12   | Upregulated | 3.29  |
| ENSG00000130511 | POC1B    | Upregulated | 2.609 |
| ENSG00000131469 | RPL39    | Upregulated | 4.097 |
| ENSG00000131725 | GPR180   | Upregulated | 7.868 |
| ENSG00000132646 | SCML1    | Upregulated | 6.991 |
| ENSG00000133789 | HNRNPUL1 | Upregulated | 2.927 |
| ENSG00000134308 | MANEAL   | Upregulated | 7.291 |
| ENSG00000135870 | TMEM205  | Upregulated | 6.691 |
| ENSG00000136098 | ITGAE    | Upregulated | 5.203 |
| ENSG00000136826 | FAM105B  | Upregulated | 5.336 |

|                 |           |             |       |
|-----------------|-----------|-------------|-------|
| ENSG00000136943 | WDR44     | Upregulated | 4.242 |
| ENSG00000137154 | PTMA      | Upregulated | 6.087 |
| ENSG00000139323 | SSBP4     | Upregulated | 4.969 |
| ENSG00000139436 | PRIM1     | Upregulated | 7.513 |
| ENSG00000140199 | POLD3     | Upregulated | 4.764 |
| ENSG00000143947 | PCNA      | Upregulated | 3.238 |
| ENSG00000144426 | FBXL4     | Upregulated | 5.398 |
| ENSG00000145592 | YEATS4    | Upregulated | 4.693 |
| ENSG00000145979 | WBSCR22   | Upregulated | 5.846 |
| ENSG00000147654 | C19orf66  | Upregulated | 5.101 |
| ENSG00000148175 | NEK3      | Upregulated | 4.88  |
| ENSG00000148296 | ORC2      | Upregulated | 3.568 |
| ENSG00000151461 | RPS6      | Upregulated | 3.233 |
| ENSG00000151876 | YIPF6     | Upregulated | 4.775 |
| ENSG00000152102 | LINC00910 | Upregulated | 5.103 |
| ENSG00000152520 | COX7A2L   | Upregulated | 5.97  |
| ENSG00000152749 | C2orf47   | Upregulated | 5.75  |

|                 |          |               |        |
|-----------------|----------|---------------|--------|
| ENSG00000153827 | EBAG9    | Upregulated   | 5.357  |
| ENSG00000157450 | YWHAQ    | Upregulated   | 4.579  |
| ENSG00000158321 | NBEAL1   | Downregulated | -4.419 |
| ENSG00000163249 | CCDC137  | Downregulated | -6.217 |
| ENSG00000165030 | NCDN     | Downregulated | -5.203 |
| ENSG00000166233 | ZNF346   | Downregulated | -2.771 |
| ENSG00000166266 | RNF115   | Downregulated | -5.386 |
| ENSG00000166987 | ARIH1    | Downregulated | -4.746 |
| ENSG00000167550 | STARD3NL | Downregulated | -4.598 |
| ENSG00000168014 | DDRKG1   | Downregulated | -3.885 |
| ENSG00000168298 | SLC25A24 | Downregulated | -3.257 |
| ENSG00000168724 | PHF5A    | Downregulated | -7.23  |
| ENSG00000169217 | UPF2     | Downregulated | -4.83  |
| ENSG00000169925 | CCNY     | Downregulated | -2.36  |
| ENSG00000169926 | GIT2     | Downregulated | -3.702 |
| ENSG00000171202 | CALD1    | Downregulated | -6.634 |
| ENSG00000171204 | BRD3     | Downregulated | -2.495 |

|                 |         |               |        |
|-----------------|---------|---------------|--------|
| ENSG00000172239 | C2CD3   | Downregulated | -4.514 |
| ENSG00000173575 | PHTF2   | Downregulated | -2.961 |
| ENSG00000174080 | AP5M1   | Downregulated | -6.197 |
| ENSG00000176371 | SLC35E2 | Downregulated | -2.481 |
| ENSG00000176834 | PAN3    | Downregulated | -6.989 |
| ENSG00000177000 | ZNF652  | Downregulated | -3.871 |
| ENSG00000179218 | CHD8    | Downregulated | -5.72  |
| ENSG00000180992 | SURF6   | Downregulated | -2.464 |
| ENSG00000181610 | TRIP12  | Downregulated | -4.376 |
| ENSG00000181704 | CTSV    | Downregulated | -2.713 |
| ENSG00000181924 | RC3H2   | Downregulated | -4.831 |
| ENSG00000182220 | MBD6    | Downregulated | -5.47  |
| ENSG00000182463 | PIP4K2B | Downregulated | -2.262 |
| ENSG00000183723 | DIDO1   | Downregulated | -6.276 |
| ENSG00000185090 | NT5C2   | Downregulated | -3.334 |
| ENSG00000185252 | RNF6    | Downregulated | -7.111 |
| ENSG00000185298 | PIGV    | Downregulated | -3.012 |

|                 |              |               |        |
|-----------------|--------------|---------------|--------|
| ENSG00000187514 | CD2BP2       | Downregulated | -6.644 |
| ENSG00000188825 | RP11.427H3.3 | Downregulated | -6.393 |
| ENSG00000196155 | RP11.697E2.7 | Downregulated | -4.879 |
| ENSG00000196517 | WDR7         | Downregulated | -5.236 |
| ENSG00000198056 | CCNYL1       | Downregulated | -3.639 |
| ENSG00000198171 | MYO9A        | Downregulated | -2.981 |
| ENSG00000198538 | SLC12A6      | Downregulated | -6.905 |
| ENSG00000198740 | ZSCAN2       | Downregulated | -4.985 |
| ENSG00000198918 | RC3H1        | Downregulated | -5.259 |
| ENSG00000204356 | CMTM4        | Downregulated | -5.374 |
| ENSG00000204564 | SWAP70       | Downregulated | -7.211 |
| ENSG00000204899 | DNASE1       | Downregulated | -3.306 |
| ENSG00000205544 | CDC14A       | Downregulated | -4.274 |
| ENSG00000213918 | ZNF74        | Downregulated | -5.024 |
| ENSG00000215421 | FAM168B      | Downregulated | -5.109 |
| ENSG00000226266 | NT5DC3       | Downregulated | -4.581 |
| ENSG00000234741 | CYP20A1      | Downregulated | -3.658 |

|                 |               |               |        |
|-----------------|---------------|---------------|--------|
| ENSG00000249915 | ZNF28         | Downregulated | -3.392 |
| ENSG00000255112 | CHD2          | Downregulated | -6.552 |
| ENSG00000265491 | ZNF407        | Downregulated | -5.567 |
| ENSG00000276293 | KMT2A         | Downregulated | -5.327 |
| ENSG00000277027 | SMG6          | Downregulated | -5.69  |
| ENSG00000123636 | BAZ2B         | Downregulated | -4.941 |
| ENSG00000081913 | PHLPP1        | Downregulated | -5.391 |
| ENSG00000235499 | AC073046.25   | Downregulated | -5.763 |
| ENSG00000263271 | RP11.1055B8.7 | Downregulated | -3.152 |
| ENSG00000176834 | VSIG10        | Downregulated | -6.344 |
| ENSG00000250899 | RP11.253E3.3  | Downregulated | -5.319 |
| ENSG00000176834 | MTHFR         | Downregulated | -4.645 |
| ENSG00000099910 | KLHL22        | Downregulated | -4.285 |
| ENSG00000040199 | PHLPP2        | Downregulated | -4.35  |
| ENSG00000158321 | AUTS2         | Downregulated | -6.557 |
